# Supplementary material for: Development and validation of a high-throughput whole cell assay to investigate Staphylococcus aureus adhesion to host ligands
Source: PubMed Central journal article supplement (PMC7864066; doi:10.1074/jbc.ra120.015360), 2021-01-13
Supplement: mmc1.pdf [file mmc1.pdf]

**Supporting information: Development and validation of a  
high-throughput whole cell assay to investigate  
*Staphylococcus aureus* adhesion to host ligands**

Laurenne E. Petrie<sup>1§</sup>, Allison C. Leonard<sup>1§</sup>, Julia Murphy<sup>1</sup> & Georgina Cox<sup>1\*</sup>

<sup>1</sup>College of Biological Sciences, Department of Molecular and Cellular Biology, University of Guelph, 50 Stone Rd E, Guelph, Ontario, Canada N1G 2W1

\*Corresponding author: Dr. Georgina Cox, College of Biological Sciences, Department of Molecular and Cellular Biology, University of Guelph, 50 Stone Rd E, Guelph, Ontario, Canada N1G 2W1. Tel: +1 519-824-4120, Email: [gcox@uoguelph.ca](mailto:gcox@uoguelph.ca)

<sup>§</sup>These authors contributed equally

**A**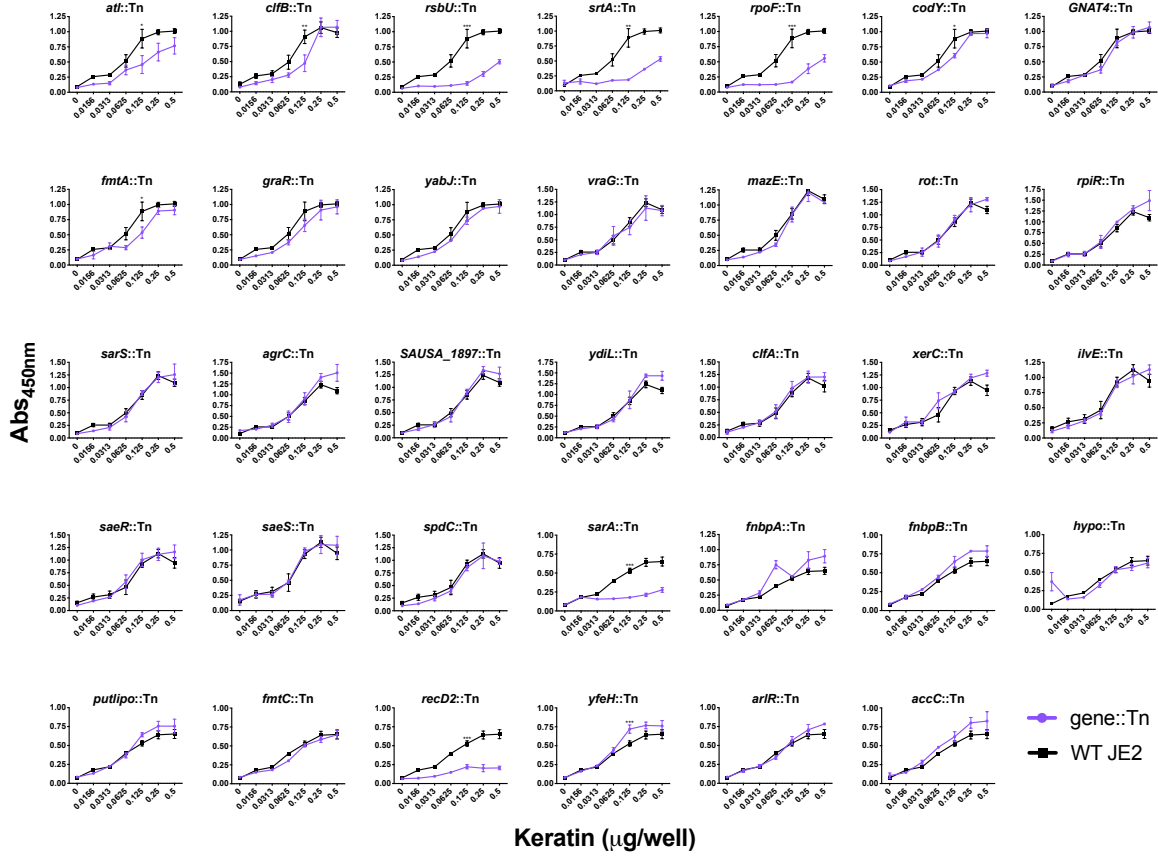**B**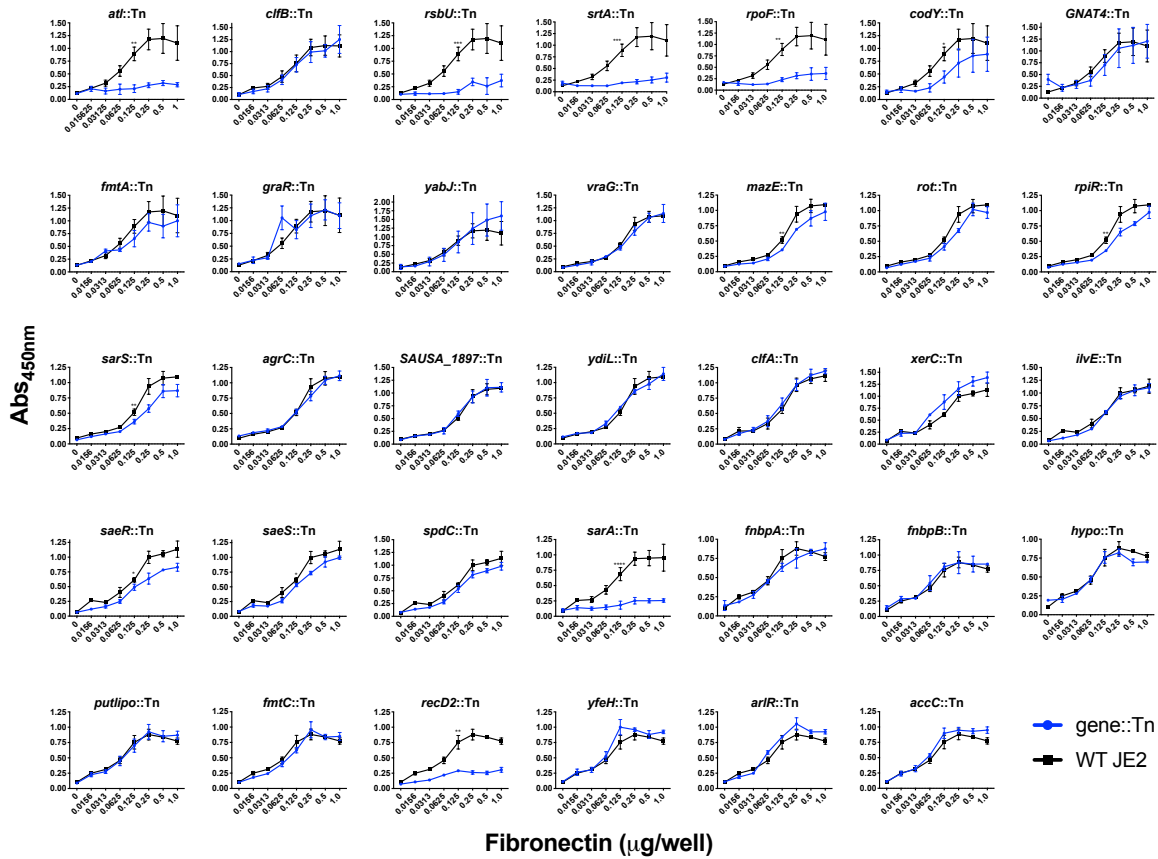

C

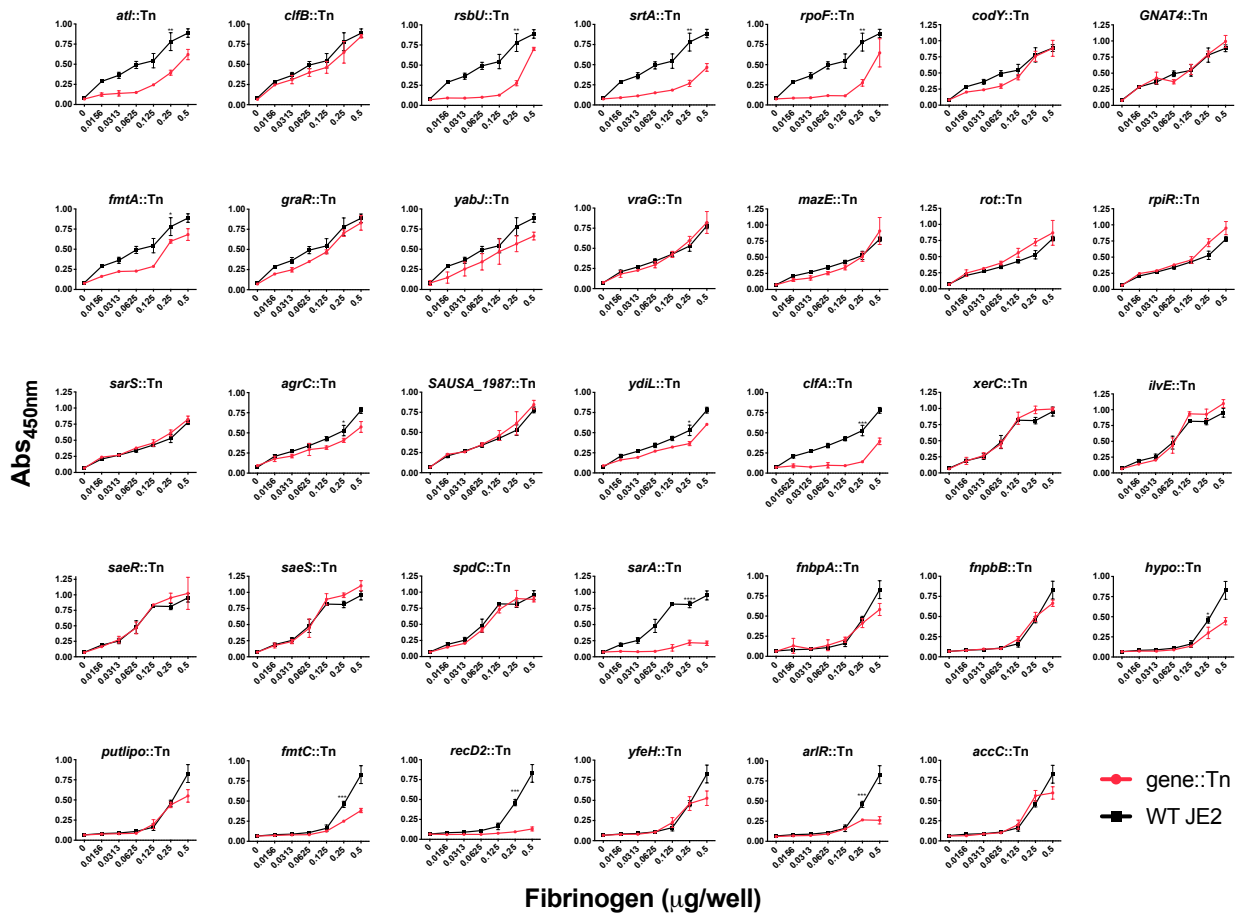

**Figure S1. Construction of a *S. aureus* Genetic Adhesion Network: genes associated with *S. aureus* adhesion to a minimum of one of three host ligands (A. Keratin, B. Fibronectin, and C. Fibrinogen).** Adhesion attenuated mutants identified in Figure 4 were compiled into a sub-library and profiled for adhesion to all three host ligands. For mutants that showed confirmed adhesion-related phenotypes, the transposons were transduced using phage 80 $\alpha$  into a fresh JE2 background, to eliminate the possibility of secondary-site mutations. These newly generated mutants (n=34 shown above) were profiled to confirm reduced adhesion. Each ligand was titrated (A-C), and the mutant strains (shown in each individual graph) were propagated in microtiter plates to the appropriate OD<sub>600nm</sub>, with three biological replicates. The ELISA was performed to assess adhesion (Abs<sub>450nm</sub>) and the values shown are the average of three biological replicates  $\pm$  the standard deviation. A final concentration was selected for each ligand (keratin 0.125 ug/well; fibronectin 0.125 ug/well; fibrinogen 0.25 ug/well) and was used to calculate the average percentage of adhesion relative to wild-type JE2 propagated in the same microtiter plate (see Table 1). *P*-values were calculated using the two-tailed unpaired Student's *t*-test; statistically significant ( $P \leq 0.05^*$ ;  $P \leq 0.01^{**}$ ;  $P \leq 0.001^{***}$ ;  $P \leq 0.0001^{****}$ ) decreases in adhesion, compared to wild-type JE2, were used to create the Genetic Adhesion Network (Figure 5).

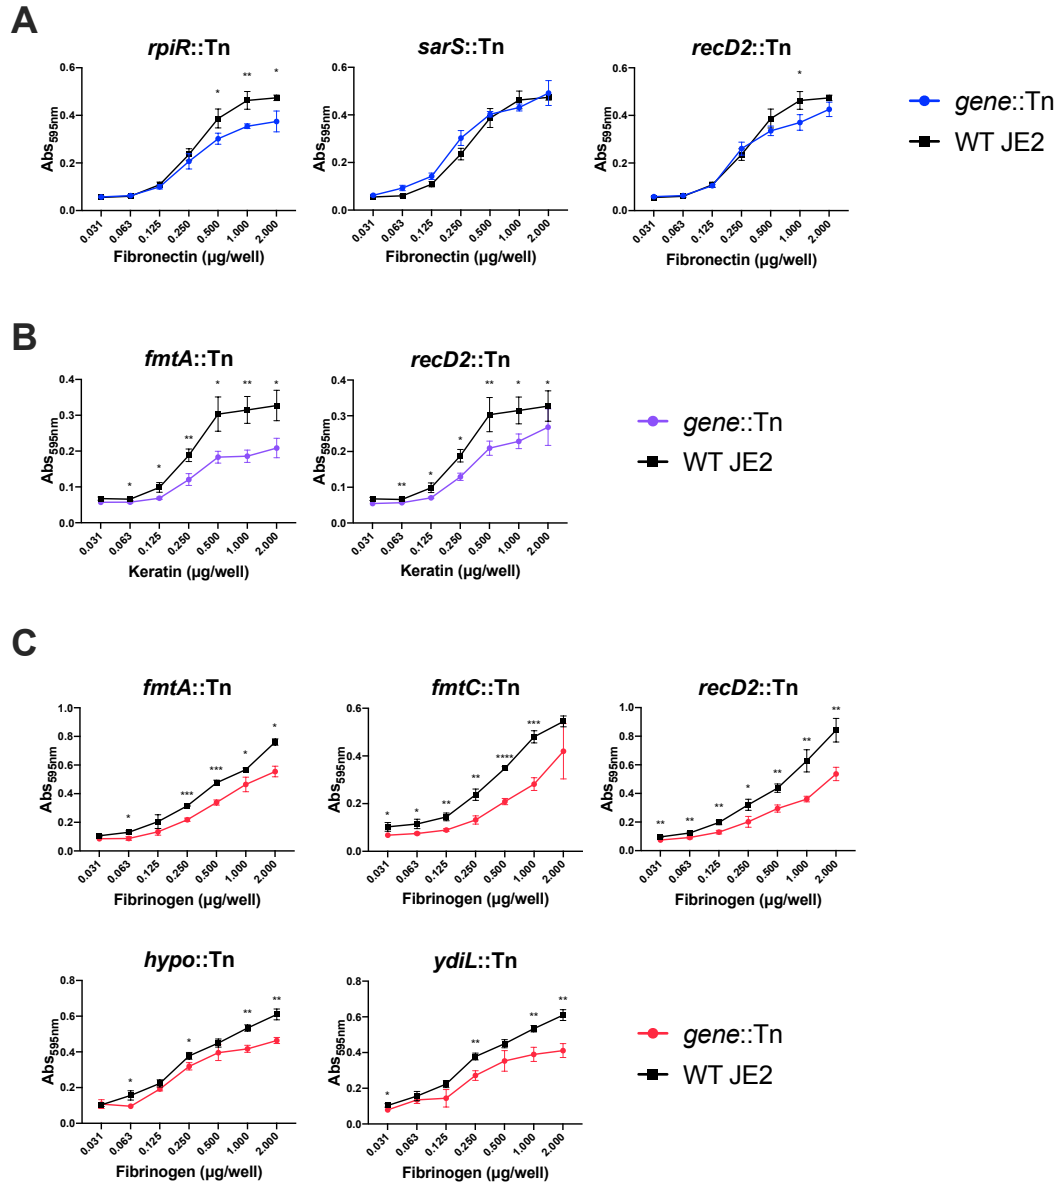

**Figure S2. Crystal violet detection of poorly characterized adhesion-defective *S. aureus* mutants (A. Fibronectin, B. Keratin, and C. Fibrinogen).** To confirm the adhesion defects were not due to decreased affinity of the ELISA antibodies, we profiled adhesion of the poorly characterized *S. aureus* mutants to their respective ligand(s) using crystal violet as an alternative detection method. Each ligand was titrated (A-C), the strains (shown in each individual graph) were propagated in 10 mL TSB to the appropriate OD<sub>600nm</sub>, with three biological replicates. Crystal violet was used to assess adhesion (Abs<sub>595nm</sub>) and the values shown are the average of three biological replicates ± the standard deviation. *P*-values were calculated using the two-tailed unpaired Student's *t*-test. Statistically significant decreases, compared to wild-type JE2, were denoted as  $P \leq 0.05^*$ ;  $P \leq 0.01^{**}$ ;  $P \leq 0.001^{***}$ ;  $P \leq 0.0001^{****}$ .
